# Supplementary material
Source: publisher figshare collection journal article supplement (https://plos.figshare.com/articles/dataset/_/11318123)
Supplement: Supplementary file [file 1]

# The effect of bigger human bodies on future global calorie requirements

## S1 Appendix - Supplementary information and tables

October 22, 2019

### 1 Supplementary information on the modeled changes in height

We model a process in which age is inherited by the next older group after five years and the reduction in height due to five years of aging is then deducted for all age groups over 19 years. The exception is the group of 20 to 24 year olds. As the aging factor that was provided applies for all people above age 18, persons moving into the age group 20 to 24 did only experience this effect for on average 3 years. Comparing the factor of height reduction provided by NCD Risk Factor Collaboration with evidence from the Baltimore Longitudinal Study of Aging [32] shows comparable reductions in height. However, we do not use the factor from the latter study, as it does not take into account the higher mortality of smaller persons while this influence is included in the estimate of the NCD Risk Factor Collaboration.

### 2 Derivation of the formula for estimation of weights of adults in 2010 and sensitivity to variance estimates

In their derivation of the average weight in an age-sex group  $W$ , [9] take into account that in a population each individual deviates from the average with regard to their BMI and height. So they define the difference between average BMI ( $\overline{BMI}$ ) and individual BMI ( $BMI$ ) as  $b = (BMI - \overline{BMI})$ . Equivalently they define the difference between average height ( $\overline{H}$ ) and individual height ( $H$ ) as  $h = (H - \overline{H})$ . Therefore a group of individuals' expected weight  $E(W)$  can be estimated by:

$$\begin{aligned} E(W) &= E(BMI * H^2) = E((\overline{BMI} + b) * (\overline{H} + h)^2) \\ &= E((\overline{BMI} + b) * (\overline{H}^2 + h^2 + 2\overline{H}h)) \\ &= E(\overline{H}^2\overline{BMI} + h^2\overline{BMI} + 2\overline{H}h\overline{BMI} + \overline{H}^2b + h^2b + \\ &\quad 2\overline{H}^2hb) \\ &= \overline{H}^2\overline{BMI} + E(h^2)\overline{BMI} + E(h)2\overline{H}\overline{BMI} + E(b)\overline{H}^2 + \\ &\quad E(bh^2) + E(hb)2\overline{H} \\ &= \overline{H}^2\overline{BMI} + E(h^2)\overline{BMI} + E(bh^2) + E(hb)2\overline{H} \end{aligned} \tag{1}$$

---

As we do not have data on variance in height,  $V(H)$ , per age-sex group for every country, we use the estimate derived for Indonesia as a general approximation. As described, the estimates for this value are not differing much between the USA and Indonesia. Considering the difference in the 2010 average BMI levels between the USA (24.79 for women and 25.43 for men) and Indonesia (21.06 for women and 20.53 for men), also the assumption that the variance in height is constant over BMI does not seem to introduce sizable biases. In fact, the difference in average variance in women's height between the USA and Indonesia of  $0.14 \text{ cm}^2$  corresponds to a 35 g difference in weight for a population with average BMI 25.

### 3 Comparison of estimated weights with DHS data

As a quality and robustness check, we use direct information on weight gathered in Demographic and Health Surveys (DHS). We use the newest DHS data available in each of the age groups 20 to 29, 30 to 39, and 40 to 49 and compare it to the population averaged weight we estimated for these age groups. For women we can compare the values in 56 countries. Averaging over all countries and taking into account the relative population of each group, we overestimate weight by 122 g. In this number over and underestimations cancel each other out, though. The mean of absolute values per country does not suffer from this problem and also this is only 845 g. The largest difference we observe is 2.59 kg. For men we can only compare the values in 17 countries. On average, we underestimate male weight by 96 g with the average deviation from the measured value being 665 g. Therefore, while there are some discrepancies there is no strong deviation of the estimates in one direction: While we slightly overestimate weight in women, we slightly underestimate weight in men in the countries where we have direct observations at our disposal.

We do the same exercise for the weight of children. We can compare the weight of children aged 0 to 4 years in 56 countries, that of those aged 5 to 9 years in 53 countries for girls and 52 for boys, and that of the 10 to 19 year old in 56 countries for girls and in 19 countries for boys. Doing this we create simple weighted averages for the age groups 0 to 4, 5 to 9, and 10 to 19 years from the estimates which are available for each year of age. As we do not have information on the number of persons for every year of age we cannot construct a population averaged measure. Therefore, we ignore age differences in mortality and the potentially larger number of births in younger cohorts related to the form of the age distribution in most countries. This introduces an upwards bias into our results (as without weighting we imply that there are as many older as younger children in each age group). The comparison shows that our estimates for the age group 0 to 4 years are very close to the measured data. On average we underestimate the weight of girls by 213 g and that of boys by 142 g (with an average deviation from the real value being 510 g and 471 g respectively). For the group aged 5 to 9 years we overestimate the weight in all countries. On average girls are 5.05 kg and boys 6.1 kg too heavy in our estimates (with average deviations being identical). In the group aged 10 to 19 years we underestimate the weight of women in all and that of men in 17 out of 19 countries. On average we underestimate girls' weight by 8.08 kg and that of boys by 4.6 kg. Yet, over all large parts of the differences cancel out when we look at the population weighted average over the three age groups. In the 53 countries for which we have data for girls in all three age groups we underestimate girls' weight by on average 2.25 kg. In the 17 countries with data for boys we overestimate their weight on average by just 279 g.

### 4 Details on the estimation of calorie requirements

According to [25], the energy needed by an adult can be estimated given the person's sex, age, weight, and activity level. The first three factors define the basic metabolic rate of a person

(BMR). This is the energy required by a person that is awake, in a supine position, did not eat for ten to 12 hours, physically rested in the eight hours before, is mentally relaxed, and is in an environment where s/he neither needs to generate body heat nor need to cool down the body temperature. We present these values in Table E.

E: Equations for the estimation of BMR from body weight

| Age<br><i>Years</i>  | Males<br><i>BMR: kcal/day</i> | Females<br><i>BMR: kcal/day</i> |
|----------------------|-------------------------------|---------------------------------|
| 18-30                | $15.057 * kg + 692.2$         | $14.818 * kg + 486.6$           |
| 30-60                | $11.472 * kg + 873.1$         | $8.126 * kg + 845.6$            |
| $\geq 60$            | $11.711 * kg + 587.7$         | $9.082 * kg + 658.5$            |
| <i>Source: [25].</i> |                               |                                 |

The physical activity level (PAL) works as a multiplier of the BMR. We assume that on average people follow a moderately active lifestyle and use the lowest multiplier connected to this group in the frame work of [25], which is 1.7. We thereby decide for a higher PAL than is being used by the FAO in estimation of food insufficiency, which is 1.55 [28]. This difference is due to the different goals of the estimations. While [28] estimate the minimum necessary for good health, we estimate what is most likely metabolized in everyday life. I.e. the lower PAL is chosen by the FAO to relate to the minimum under which healthy body functions can be sustained. Our estimates are not supposed to relate to the lower bound but to the likely average requirements of a population. Notice that as the PAL acts as a multiplier, increases in the BMR due to higher body weight will have a more than proportional effect on the calorie requirement.

As a simplification, we do not take into account the energy required to build up the additional weight that comes with gains in BMI and height. Given that there are always some people gaining weight and some losing weight, a precise estimation of this factor would require to model the energy spent on increases in BMI minus the energy persons make available from energy deposits in their body. Ignoring the net energy requirement of this process introduces an underestimation in our estimations, yet we are optimistic that this effect is comparably small.

Denoting the calories used for growth as  $\iota_f$  for girls and  $\iota_m$  for boys, the formula for children's calorie requirements are given for girls as

$$kcal/day_f = 263.4 + 65.3 * kg - 0.454 * kg^2 + \iota_f \quad (2)$$

and for boys as

$$kcal/day_m = 310.2 + 63.3 * kg - 0.263 * kg^2 + \iota_m. \quad (3)$$

These estimations already account for energy spend on activities.

For children not older than 12 months we use another estimate by [25], specifying the calorie requirements as

$$kcal/day = -95.4 + 88.3 * kg + \iota_i. \quad (4)$$

Also here  $\iota_i$  defines the increment for growth, but there is no differentiation between boys and girls requirements. As we also include the energy requirements for lactation, we only estimate the energy necessary in the seventh to 12th month. The increment for growth is the average

---

requirement over the respective month. As we do not have height data per month, we have to use the average height of all infants, thereby including the height of those six month and younger. Thereby, we underestimate the actual height of the seven to 12 month olds, which again leads to an underestimation of calorie requirements in this age group. This bias is (partially) reduced by a second bias: As we only have data on the total population aged zero to four years, we assume that the population is evenly distributed over age in this group. This is most likely not the case as due to child mortality the number of children reduces over age and in a growing population younger cohorts are larger. Hence, we underestimate the share of below one year olds among the population of the zero to four years old.

## References

- [32] Sorkin JD, Muller DC, Andres R. Longitudinal Change in Height of Men and Women: Implications for Interpretation of the Body Mass Index: The Baltimore Longitudinal Study of Aging. *American Journal of Epidemiology*. 1999;150(9):969–977.

---

**A: Calorie deficits in 2010 and comparison to FAO figures.** Comparison of estimated average per capita and day calorie requirements, with calories available for human consumption in 2010, the difference between the two, and the three years average food deficit in kcal per capita and day. For Antigua and Barbuda and Grenada no information on the last point is available.

| Country             | Available kcal<br>(avg. p.c. & day) | Required kcal<br>(avg p.c. & day) | Surplus kcal<br>(avg p.c. & day) | FAO food deficit kcal<br>(3-year avg p.c. & day) |
|---------------------|-------------------------------------|-----------------------------------|----------------------------------|--------------------------------------------------|
| Antigua and Barbuda | 2316                                | 2443                              | -127                             |                                                  |
| Bolivia             | 2177                                | 2218                              | -41                              | 182                                              |
| Botswana            | 2234                                | 2282                              | -48                              | 227                                              |
| Grenada             | 2432                                | 2440                              | -8                               |                                                  |
| Haiti               | 2169                                | 2233                              | -64                              | 503                                              |
| Namibia             | 2055                                | 2201                              | -146                             | 278                                              |
| North Korea         | 2089                                | 2247                              | -158                             | 341                                              |
| Tajikistan          | 2105                                | 2267                              | -162                             | 292                                              |
| Zambia              | 1904                                | 2030                              | -126                             | 442                                              |

---

B: Missing data on height and their replacements.

| Country                         | Replaced with data from |
|---------------------------------|-------------------------|
| Andorra                         | Spain                   |
| Bahrain                         | Saudi Arabia            |
| Bhutan                          | India                   |
| Equatorial Guinea               | Sao Thome & Principe    |
| Micronesia, Federated States of | Vanuatu                 |
| Puerto Rico                     | USA                     |
| Qatar                           | UAE                     |
| Singapore                       | South Korea             |
| Tonga                           | Vanuatu                 |

---

**C: Countries and territories with missing data on BMI or completely missing data.**  
Next to it are the countries that were used to replace the information or into which the population was merged.

| Country           | Replaced with data from | Merged into |
|-------------------|-------------------------|-------------|
| Aruba             | Saint Kitts and Nevis   |             |
| Curacao           | Netherlands             |             |
| French Guyana     |                         | France      |
| Guadeloupe        |                         | France      |
| Guam              |                         | USA         |
| Macao             |                         | PRC         |
| Martinique        |                         | France      |
| Mayotte           |                         | France      |
| New Caledonia     |                         | France      |
| Reunion           |                         | France      |
| South Sudan       | Sudan                   |             |
| US Virgin Islands |                         | USA         |
| West Sahara       | Morocco                 |             |

**D: Country/territory level results under all four scenarios.** The numbers display the relative increase in calorie requirements between 2010 and 2100. Each column shows the result for one of the four scenarios.

| Country                  | Stable Weight<br>pct.change | Rising BMI<br>pct. change | Rising Height<br>pct. change | Rising Height & BMI<br>pct. change |
|--------------------------|-----------------------------|---------------------------|------------------------------|------------------------------------|
| Afghanistan              | 127                         | 135                       | 149                          | 158                                |
| Albania                  | -41                         | -38                       | -40                          | -37                                |
| Algeria                  | 70                          | 76                        | 79                           | 85                                 |
| Angola                   | 627                         | 660                       | 681                          | 717                                |
| Antigua and Barbuda      | 31                          | 38                        | 31                           | 38                                 |
| Argentina                | 44                          | 51                        | 45                           | 51                                 |
| Armenia                  | -40                         | -38                       | -39                          | -36                                |
| Aruba                    | -18                         | -13                       | -19                          | -15                                |
| Australia                | 89                          | 93                        | 90                           | 94                                 |
| Austria                  | -3                          | -1                        | 0                            | 2                                  |
| Azerbaijan               | 5                           | 10                        | 6                            | 12                                 |
| Bahamas                  | 37                          | 44                        | 36                           | 44                                 |
| Bahrain                  | 20                          | 27                        | 25                           | 32                                 |
| Bangladesh               | 11                          | 16                        | 24                           | 30                                 |
| Barbados                 | -9                          | -6                        | -8                           | -5                                 |
| Belarus                  | -29                         | -27                       | -27                          | -26                                |
| Belgium                  | 19                          | 22                        | 21                           | 24                                 |
| Belize                   | 120                         | 128                       | 119                          | 128                                |
| Benin                    | 305                         | 325                       | 337                          | 359                                |
| Bhutan                   | 9                           | 14                        | 17                           | 23                                 |
| Bolivia                  | 89                          | 99                        | 96                           | 107                                |
| Bosnia and Herzegovina   | -52                         | -51                       | -50                          | -50                                |
| Botswana                 | 86                          | 93                        | 97                           | 105                                |
| Brazil                   | 0                           | 5                         | 3                            | 8                                  |
| Brunei                   | 22                          | 31                        | 25                           | 35                                 |
| Bulgaria                 | -55                         | -54                       | -54                          | -53                                |
| Burkina Faso             | 463                         | 488                       | 517                          | 546                                |
| Burundi                  | 609                         | 642                       | 687                          | 725                                |
| Cabo Verde               | 40                          | 45                        | 49                           | 54                                 |
| Cambodia                 | 67                          | 77                        | 86                           | 97                                 |
| Cameroon                 | 332                         | 351                       | 359                          | 380                                |
| Canada                   | 43                          | 47                        | 43                           | 47                                 |
| Central African Republic | 200                         | 215                       | 228                          | 246                                |
| Chad                     | 542                         | 567                       | 603                          | 632                                |
| Chile                    | 14                          | 21                        | 14                           | 21                                 |
| China                    | -28                         | -24                       | -23                          | -19                                |
| China (Hong Kong SAR)    | 8                           | 13                        | 14                           | 21                                 |
| Colombia                 | -1                          | 3                         | 1                            | 6                                  |
| Comoros                  | 250                         | 269                       | 274                          | 295                                |
| Congo                    | 477                         | 505                       | 523                          | 555                                |
| Costa Rica               | 8                           | 15                        | 10                           | 17                                 |
| Cote d'Ivoire            | 437                         | 464                       | 473                          | 503                                |
| Croatia                  | -40                         | -39                       | -39                          | -38                                |



**D: Country/territory level results under all four scenarios.** The numbers display the relative increase in calorie requirements between 2010 and 2100. Each column shows the result for one of the four scenarios.

| Country            | Stable Weight<br>pct.change | Rising BMI<br>pct. change | Rising Height<br>pct. change | Rising Height & BMI<br>pct. change |
|--------------------|-----------------------------|---------------------------|------------------------------|------------------------------------|
| Cuba               | -39                         | -37                       | -37                          | -34                                |
| Curacao            | 41                          | 41                        | 44                           | 44                                 |
| Cyprus             | 23                          | 29                        | 22                           | 28                                 |
| Czech Republic     | -18                         | -16                       | -18                          | -17                                |
| DR Congo           | 546                         | 575                       | 614                          | 649                                |
| Denmark            | 22                          | 23                        | 26                           | 27                                 |
| Djibouti           | 39                          | 47                        | 50                           | 59                                 |
| Dominican Republic | 23                          | 30                        | 27                           | 34                                 |
| Ecuador            | 67                          | 75                        | 70                           | 79                                 |
| Egypt              | 155                         | 168                       | 151                          | 165                                |
| El Salvador        | -26                         | -22                       | -25                          | -21                                |
| Equatorial Guinea  | 335                         | 357                       | 357                          | 382                                |
| Eritrea            | 256                         | 271                       | 300                          | 319                                |
| Estonia            | -33                         | -32                       | -32                          | -31                                |
| Ethiopia           | 195                         | 209                       | 235                          | 251                                |
| Fiji               | -18                         | -15                       | -17                          | -14                                |
| Finland            | 8                           | 10                        | 9                            | 11                                 |
| France             | 21                          | 25                        | 25                           | 28                                 |
| French Polynesia   | 8                           | 11                        | 6                            | 8                                  |
| Gabon              | 206                         | 220                       | 221                          | 236                                |
| Gambia             | 477                         | 507                       | 518                          | 552                                |
| Georgia            | -43                         | -41                       | -43                          | -41                                |
| Germany            | -23                         | -22                       | -22                          | -21                                |
| Ghana              | 218                         | 234                       | 239                          | 257                                |
| Greece             | -35                         | -33                       | -36                          | -33                                |
| Grenada            | -31                         | -29                       | -29                          | -27                                |
| Guatemala          | 151                         | 162                       | 159                          | 171                                |
| Guinea             | 379                         | 402                       | 420                          | 446                                |
| Guinea Bissau      | 259                         | 276                       | 288                          | 308                                |
| Guyana             | -19                         | -15                       | -16                          | -13                                |
| Haiti              | 40                          | 46                        | 50                           | 57                                 |
| Honduras           | 46                          | 52                        | 51                           | 58                                 |
| Hungary            | -36                         | -34                       | -35                          | -33                                |
| Iceland            | 20                          | 21                        | 22                           | 23                                 |
| India              | 36                          | 42                        | 51                           | 58                                 |
| Indonesia          | 29                          | 37                        | 41                           | 50                                 |
| Iran               | -8                          | -3                        | -5                           | 0                                  |
| Iraq               | 472                         | 501                       | 474                          | 503                                |
| Ireland            | 38                          | 41                        | 37                           | 41                                 |
| Israel             | 141                         | 147                       | 142                          | 148                                |
| Italy              | -18                         | -15                       | -17                          | -14                                |
| Jamaica            | -38                         | -35                       | -36                          | -34                                |
| Japan              | -36                         | -34                       | -31                          | -28                                |

**D: Country/territory level results under all four scenarios.** The numbers display the relative increase in calorie requirements between 2010 and 2100. Each column shows the result for one of the four scenarios.

| Country                          | Stable Weight<br>pct.change | Rising BMI<br>pct. change | Rising Height<br>pct. change | Rising Height & BMI<br>pct. change |
|----------------------------------|-----------------------------|---------------------------|------------------------------|------------------------------------|
| Jordan                           | 132                         | 143                       | 127                          | 138                                |
| Kazakhstan                       | 54                          | 62                        | 56                           | 64                                 |
| Kenya                            | 320                         | 335                       | 356                          | 372                                |
| Kiribati                         | 151                         | 158                       | 146                          | 153                                |
| Kuwait                           | 110                         | 118                       | 105                          | 113                                |
| Kyrgyzstan                       | 71                          | 80                        | 75                           | 84                                 |
| Laos                             | 68                          | 84                        | 84                           | 103                                |
| Latvia                           | -40                         | -39                       | -39                          | -38                                |
| Lebanon                          | 8                           | 12                        | 7                            | 12                                 |
| Lesotho                          | 85                          | 94                        | 96                           | 106                                |
| Liberia                          | 335                         | 361                       | 364                          | 393                                |
| Libya                            | 33                          | 38                        | 33                           | 38                                 |
| Lithuania                        | -36                         | -35                       | -36                          | -35                                |
| Luxembourg                       | 100                         | 104                       | 101                          | 105                                |
| Macedonia (TFYR)                 | -30                         | -28                       | -28                          | -26                                |
| Madagascar                       | 434                         | 459                       | 491                          | 520                                |
| Malawi                           | 538                         | 574                       | 591                          | 633                                |
| Malaysia                         | 44                          | 53                        | 51                           | 60                                 |
| Maldives                         | 32                          | 40                        | 39                           | 47                                 |
| Mali                             | 582                         | 596                       | 640                          | 655                                |
| Malta                            | -17                         | -12                       | -18                          | -13                                |
| Mauritania                       | 288                         | 308                       | 309                          | 331                                |
| Mauritius                        | -25                         | -21                       | -22                          | -18                                |
| Mexico                           | 26                          | 36                        | 26                           | 36                                 |
| Micronesia (Federated States of) | 19                          | 22                        | 17                           | 20                                 |
| Moldova                          | -56                         | -54                       | -55                          | -53                                |
| Mongolia                         | 65                          | 74                        | 71                           | 81                                 |
| Montenegro                       | -31                         | -29                       | -29                          | -27                                |
| Morocco                          | 28                          | 34                        | 33                           | 40                                 |
| Mozambique                       | 470                         | 500                       | 522                          | 557                                |
| Myanmar                          | 10                          | 15                        | 20                           | 26                                 |
| Namibia                          | 176                         | 188                       | 195                          | 209                                |
| Nepal                            | 13                          | 19                        | 24                           | 32                                 |
| Netherlands                      | 2                           | 2                         | 5                            | 5                                  |
| New Zealand                      | 39                          | 42                        | 38                           | 41                                 |
| Nicaragua                        | 24                          | 30                        | 27                           | 34                                 |
| Niger                            | 1326                        | 1391                      | 1464                         | 1541                               |
| Nigeria                          | 412                         | 438                       | 449                          | 478                                |
| North Korea                      | 0                           | 4                         | 9                            | 15                                 |
| Norway                           | 59                          | 61                        | 62                           | 63                                 |
| Occupied Palestinian Territory   | 319                         | 337                       | 316                          | 333                                |
| Oman                             | 89                          | 99                        | 95                           | 106                                |
| Pakistan                         | 125                         | 133                       | 141                          | 150                                |

**D: Country/territory level results under all four scenarios.** The numbers display the relative increase in calorie requirements between 2010 and 2100. Each column shows the result for one of the four scenarios.

| Country                          | Stable Weight<br>pct.change | Rising BMI<br>pct. change | Rising Height<br>pct. change | Rising Height & BMI<br>pct. change |
|----------------------------------|-----------------------------|---------------------------|------------------------------|------------------------------------|
| Panama                           | 68                          | 75                        | 72                           | 79                                 |
| Papua New Guinea                 | 177                         | 190                       | 190                          | 204                                |
| Paraguay                         | 43                          | 50                        | 48                           | 55                                 |
| Peru                             | 43                          | 51                        | 47                           | 55                                 |
| Philippines                      | 86                          | 92                        | 101                          | 108                                |
| Poland                           | -44                         | -42                       | -43                          | -41                                |
| Portugal                         | -31                         | -28                       | -30                          | -27                                |
| Puerto Rico                      | -42                         | -38                       | -42                          | -39                                |
| Qatar                            | 62                          | 70                        | 59                           | 67                                 |
| Romania                          | -48                         | -46                       | -47                          | -45                                |
| Russian Federation               | -19                         | -17                       | -18                          | -16                                |
| Rwanda                           | 165                         | 177                       | 195                          | 210                                |
| Saint Lucia                      | -4                          | 0                         | -6                           | -2                                 |
| Saint Vincent and the Grenadines | -29                         | -26                       | -28                          | -24                                |
| Samoa                            | 53                          | 60                        | 44                           | 50                                 |
| Sao Tome and Principe            | 239                         | 256                       | 257                          | 276                                |
| Saudi Arabia                     | 72                          | 81                        | 71                           | 80                                 |
| Senegal                          | 525                         | 545                       | 577                          | 600                                |
| Serbia                           | -42                         | -41                       | -41                          | -40                                |
| Seychelles                       | -14                         | -12                       | -12                          | -10                                |
| Sierra Leone                     | 171                         | 185                       | 195                          | 211                                |
| Singapore                        | 6                           | 10                        | 13                           | 17                                 |
| Slovakia                         | -32                         | -31                       | -32                          | -31                                |
| Slovenia                         | -20                         | -19                       | -19                          | -17                                |
| Solomon Islands                  | 176                         | 187                       | 188                          | 200                                |
| Somalia                          | 561                         | 598                       | 623                          | 667                                |
| South Africa                     | 31                          | 38                        | 33                           | 40                                 |
| South Korea                      | -26                         | -23                       | -21                          | -17                                |
| South Sudan                      | 353                         | 376                       | 374                          | 400                                |
| Spain                            | -20                         | -16                       | -19                          | -16                                |
| Sri Lanka                        | -27                         | -24                       | -21                          | -17                                |
| Sudan                            | 281                         | 301                       | 299                          | 321                                |
| Suriname                         | 8                           | 12                        | 9                            | 14                                 |
| Swaziland                        | 86                          | 95                        | 91                           | 101                                |
| Sweden                           | 53                          | 54                        | 56                           | 57                                 |
| Switzerland                      | 41                          | 44                        | 45                           | 48                                 |
| Syria                            | 93                          | 104                       | 93                           | 103                                |
| Taiwan                           | -49                         | -46                       | -46                          | -43                                |
| Tajikistan                       | 156                         | 167                       | 166                          | 179                                |
| Tanzania                         | 610                         | 645                       | 665                          | 704                                |
| Thailand                         | -40                         | -36                       | -36                          | -31                                |
| Timor-Leste                      | 222                         | 238                       | 262                          | 282                                |
| Togo                             | 368                         | 391                       | 404                          | 431                                |

**D: Country/territory level results under all four scenarios.** The numbers display the relative increase in calorie requirements between 2010 and 2100. Each column shows the result for one of the four scenarios.

| Country                  | Stable Weight<br>pct.change | Rising BMI<br>pct. change | Rising Height<br>pct. change | Rising Height & BMI<br>pct. change |
|--------------------------|-----------------------------|---------------------------|------------------------------|------------------------------------|
| Tonga                    | 66                          | 64                        | 57                           | 55                                 |
| Trinidad and Tobago      | -26                         | -24                       | -26                          | -24                                |
| Tunisia                  | 17                          | 21                        | 21                           | 25                                 |
| Turkey                   | 23                          | 29                        | 23                           | 29                                 |
| Turkmenistan             | 14                          | 19                        | 17                           | 21                                 |
| Uganda                   | 571                         | 604                       | 635                          | 674                                |
| Ukraine                  | -43                         | -42                       | -42                          | -41                                |
| United Arab Emirates     | 44                          | 51                        | 44                           | 51                                 |
| United Kingdom           | 30                          | 33                        | 31                           | 34                                 |
| United States of America | 44                          | 46                        | 41                           | 44                                 |
| Uruguay                  | -2                          | 1                         | -2                           | 2                                  |
| Uzbekistan               | 19                          | 24                        | 22                           | 28                                 |
| Vanuatu                  | 205                         | 213                       | 215                          | 223                                |
| Venezuela                | 46                          | 54                        | 48                           | 57                                 |
| Vietnam                  | 16                          | 21                        | 30                           | 36                                 |
| West Sahara              | 103                         | 113                       | 112                          | 122                                |
| Yemen                    | 132                         | 145                       | 149                          | 163                                |
| Zambia                   | 715                         | 755                       | 786                          | 833                                |
| Zimbabwe                 | 209                         | 222                       | 232                          | 247                                |
